# Supplementary material
Source: HighWire-hosted journal article supplement (https://jnm.snmjournals.org/highwire/filestream/94108/field_highwire_adjunct_files/0/jnm080838_Suppl_table.pdf)
Supplement: jnm080838_Suppl_table.pdf [file jnm080838_Suppl_table.pdf]

**Supplemental Table 1. Cardiovascular risk factors stratified by quartile of maximum**

**TBR**

|                                    | 1st quartile<br>(n=30)         | 2nd quartile<br>(n=30)          | 3rd quartile<br>(n=30)            | 4th quartile<br>(n=30)            | P value            |
|------------------------------------|--------------------------------|---------------------------------|-----------------------------------|-----------------------------------|--------------------|
| Maximum TBR                        | (0.83 -1.10)                   | (1.10-1.27)                     | (1.27-1.42)                       | (1.42-2.35)                       |                    |
| Age (years)                        | 51.5 ± 9.0                     | 50.4 ± 7.8                      | 47.4 ± 12.9                       | 51.1 ± 9.7                        | 0.60               |
| BMI (kg/m <sup>2</sup> )           | 22.3 ± 3.2 <sup>a</sup>        | 24.2 ± 2.3 <sup>ab</sup>        | 25.4 ± 3.5 <sup>b</sup>           | 26.0 ± 3.1 <sup>b</sup>           | <0.01 <sup>*</sup> |
| Waist circumference (cm)           | 80.0 ± 9.3 <sup>a</sup>        | 83.4 ± 6.6 <sup>ab</sup>        | 85.6 ± 7.9 <sup>bc</sup>          | 88.7 ± 6.5 <sup>c</sup>           | <0.01 <sup>*</sup> |
| SBP (mm Hg)                        | 122.8 ± 11.0                   | 120.3 ± 16.6                    | 125.0 ± 14.4                      | 128.8 ± 27.5                      | 0.13               |
| DBP (mm Hg)                        | 80.7 ± 7.7 <sup>a</sup>        | 79.8 ± 10.3 <sup>a</sup>        | 82.1 ± 11.6 <sup>a</sup>          | 89.3 ± 11.0 <sup>b</sup>          | <0.01 <sup>*</sup> |
| LDL-C (mg/dL)                      | 93.6 ± 29.7 <sup>a</sup>       | 155.3 ± 34.0 <sup>b</sup>       | 102.5 ± 24.1 <sup>a</sup>         | 152.8 ± 24.1 <sup>b</sup>         | <0.01 <sup>†</sup> |
| HDL-C (mg/dL)                      | 48.2 ± 14.9                    | 52.7 ± 12.2                     | 44.6 ± 12.6                       | 45.4 ± 10.4                       | 0.11               |
| Triglycerides (mg/dL) <sup>‡</sup> | 65.5 (53.0, 96.3) <sup>a</sup> | 95.0 (70.5, 148.0) <sup>b</sup> | 113.0 (86.0, 219.5) <sup>bc</sup> | 131.0 (118.5, 180.8) <sup>c</sup> | <0.01 <sup>*</sup> |
| FBG (mg/dL)                        | 77.6 ± 15.2                    | 90.8 ± 11.4                     | 92.2 ± 15.1                       | 98.1 ± 10.4                       | <0.01 <sup>*</sup> |
| hsCRP (mg/L) <sup>‡</sup>          | 0.31 (0.20, 0.76) <sup>a</sup> | 0.52 (0.41, 0.74) <sup>a</sup>  | 2.98 (2.20, 5.61) <sup>b</sup>    | 3.43 (2.52, 6.05) <sup>b</sup>    | <0.01 <sup>*</sup> |
| Lp-PLA <sub>2</sub> (ng/mL)        | 216.9 ± 89.4 <sup>a</sup>      | 154.7 ± 82.2 <sup>b</sup>       | 159.7 ± 65.1 <sup>b</sup>         | 161.0 ± 51.0 <sup>b</sup>         | 0.02 <sup>†</sup>  |
| MCP-1 (pg/mL)                      | 245.1 ± 64.6                   | 302.7 ± 153.8                   | 284.2 ± 140.3                     | 307.1 ± 144.8                     | 0.14               |
| Mean IMT (mm)                      | 0.68 ± 0.19                    | 0.67 ± 0.15                     | 0.63 ± 0.16                       | 0.73 ± 0.13                       | 0.31               |
| Maximum IMT (mm)                   | 0.81 ± 0.25                    | 0.80 ± 0.16                     | 0.76 ± 0.19                       | 0.90 ± 0.19                       | 0.19               |

TBR = target-to-background ratio; BMI = body mass index; SBP = systolic blood pressure; DBP =

diastolic blood pressure; LDL-C = low-density lipoprotein cholesterol; HDL-C = high-density

lipoprotein cholesterol; FBG = fasting blood glucose; hsCRP = high sensitivity C-reactive protein;

Lp-PLA<sub>2</sub> = lipoprotein-associated phospholipase A<sub>2</sub>; MCP-1 = monocyte chemoattractant protein-1;

IMT = intima-media thickness.

Data are expressed as the mean ± SD or median (inter-quartile range).

<sup>\*</sup>: *P*-value represents significant linear association with maximum TBR levels.

<sup>†</sup>: *P*-value represents significant quadratic or cubic relationships with maximum TBR levels.

<sup>‡</sup>: Original value was transformed to the ranked one in order to compute the *P*-value for linear trend.

<sup>a,b,c</sup>: Same alphabet indicates no statistical difference between the two groups, based on Tukey's HSD

*post-hoc* analysis.
